# Supplementary material for: Population Analysis of Vibrio cholerae in Aquatic Reservoirs Reveals a Novel Sister Species (Vibrio paracholerae sp. nov.) with a History of Association with Humans
Source: PubMed Central journal article supplement (PMC8357300; doi:10.1128/aem.00422-21), 2021-08-11
Supplement: aem00422-21_supp_1_seq13.pdf [file aem00422-21_supp_1_seq13.pdf]

**Supplementary material:**

**Supplementary tables and figures:**

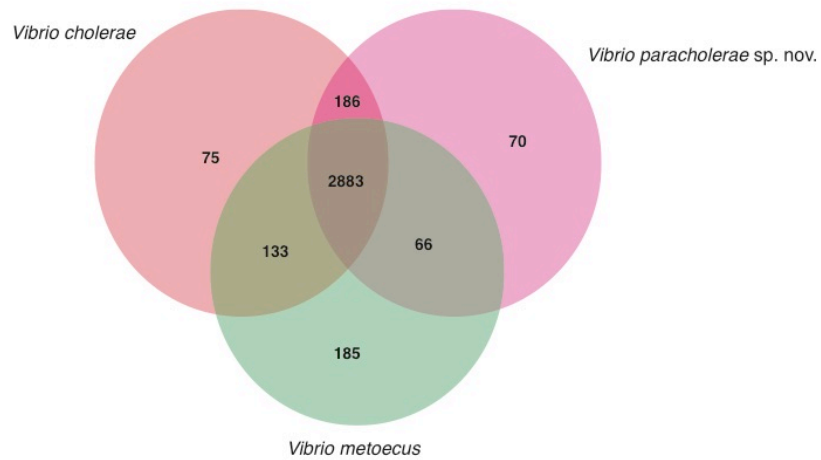

**Fig. S1: Venn diagram of the orthologous protein coding gene family comparison of *Vibrio paracholerae* sp. nov. with *V. cholerae* and *V. metoecus*.** Shared and unique gene clusters were calculated using OrthoVenn2 (<https://orthovenn2.bioinfotoolkits.net/home>).

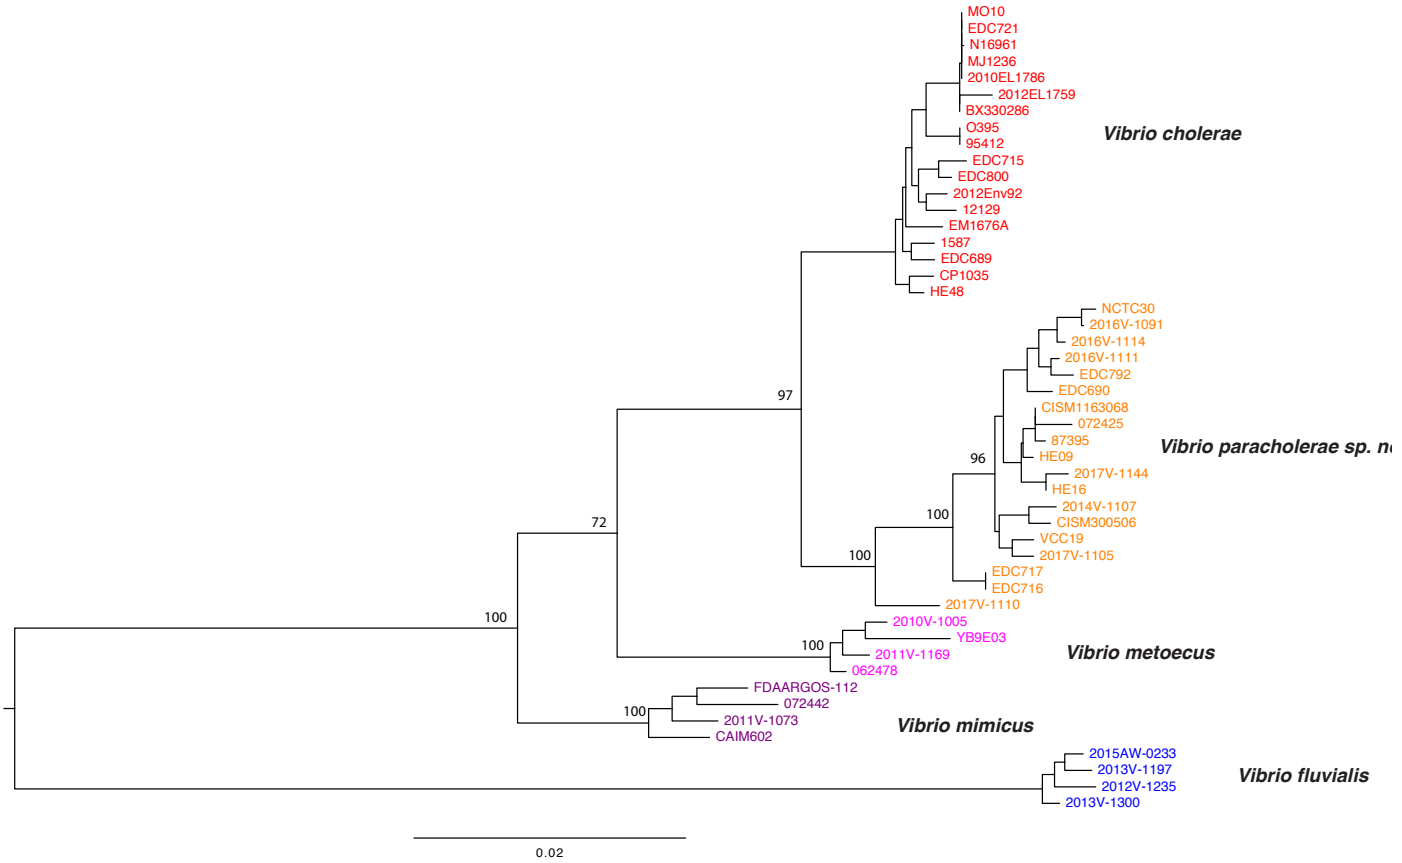

**Fig. S2: Multilocus sequence analysis (MLSA) of *Vibrio paracholerae* sp. nov. and its sister species.** The maximum-likelihood (PhyML) phylogenetic tree was constructed from the alignment (7392 bp) of four protein coding housekeeping genes (*rpoA*, *rpoB*, *recA*, *pyrH*). Bootstrap support values over 70% are indicated on the corresponding nodes.

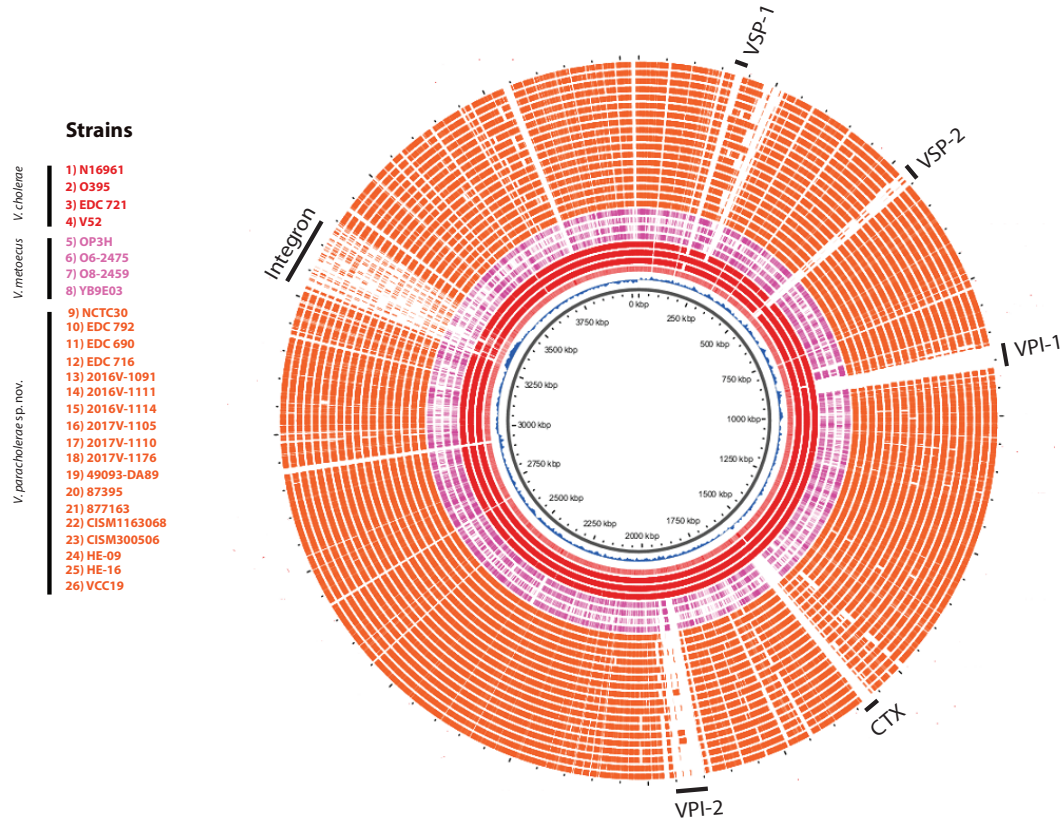

**Figure S3: BLAST atlas of *V. paracholerae* sp. nov., *V. cholerae* and *V. metoecus* strains. *V. cholerae* strain N16961 was used as the reference sequence for BLASTN comparisons. Each colored ring represent a genome starting from N16961. Outermost black bars indicate the major genomic islands of *V. cholerae*. VSI Vibrio seventh pandemic island, VPI, Vibrio pathogenicity island, CTX, cholera toxin prophage.**

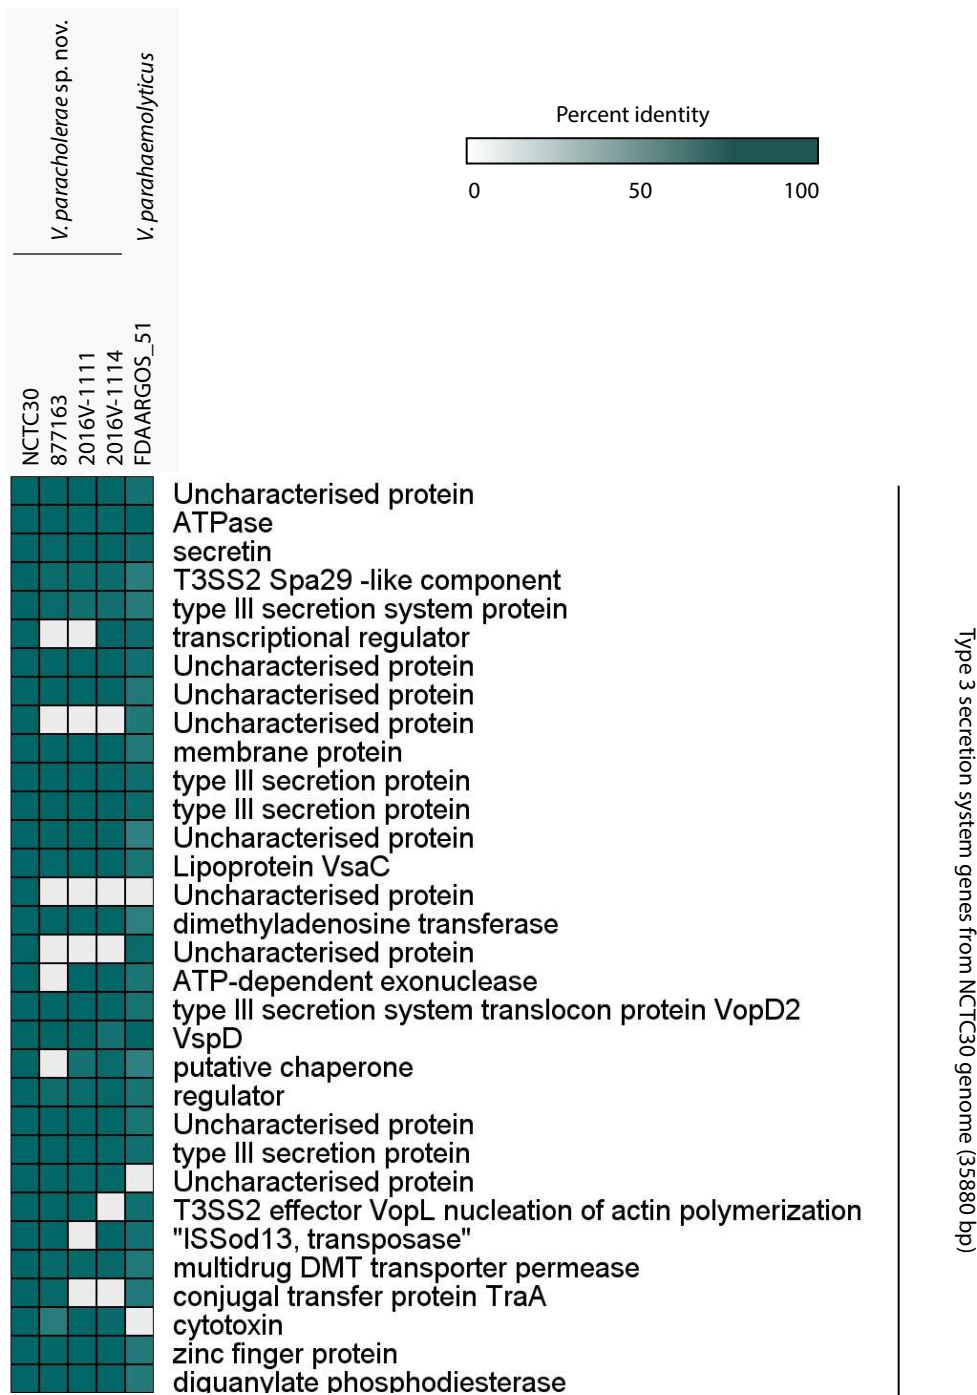

**Figure S4: Comparison of T3SS island found in *Vibrio paracholerae* sp. nov. and *Vibrio parahaemolyticus*.** Genes found in T3SS island of NCTC30 genome were screened in the genomes of three T3SS positive *V. paracholerae* sp. nov. strains and *V. parahaemolyticus* strain FDAARGOS\_51 using BLASTN. Green box indicates presence and white box indicates absence of the genes.

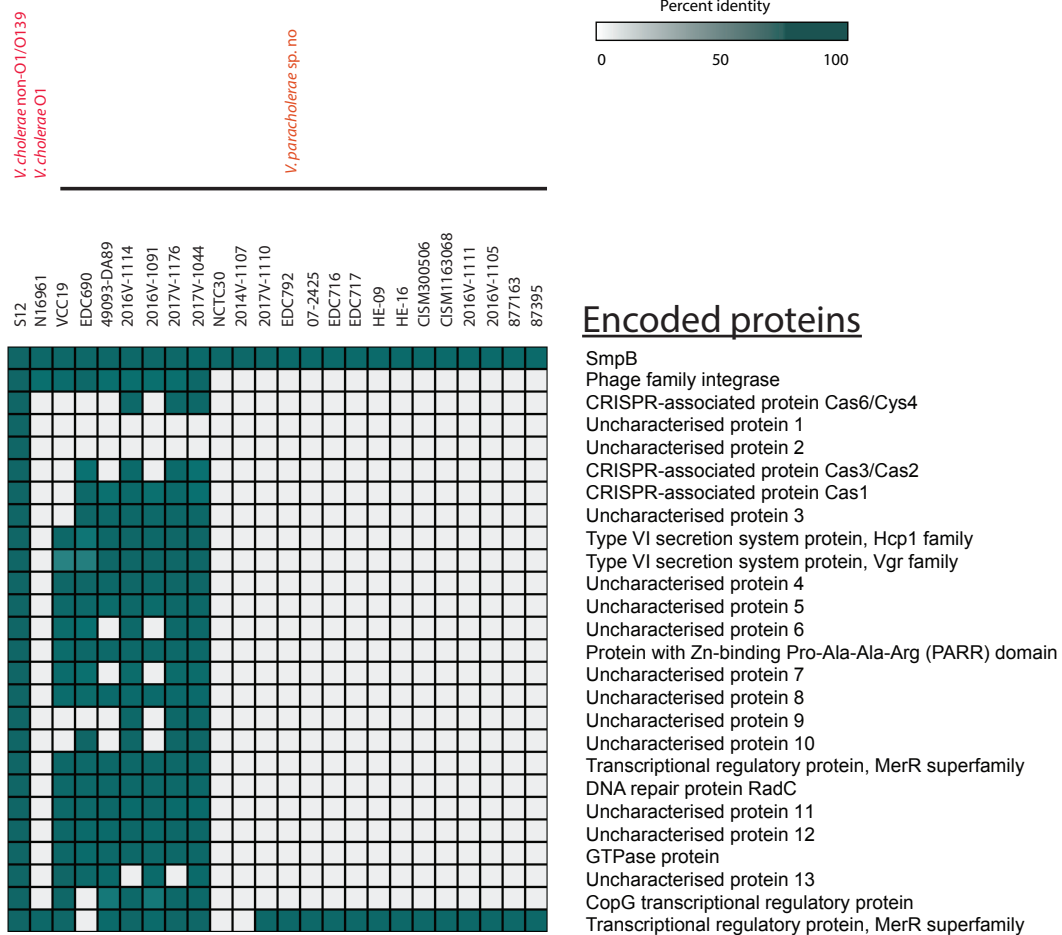

**Figure S5: Presence of GIVchS12 island within VPI-1 insertion site in *V. paracholerae* sp. nov. isolates.** Regions of nucleotide identity to VPI-1 and surrounding regions in *V. cholerae* N16961 are shown. Presence of Protein coding genes in GIVchS12 island described by Maurizio *et al* were looked for using BLASTN in *V. paracholerae* sp. nov. genomes. Green box indicates presence and white box indicates absence of genes.

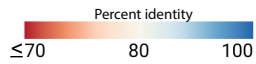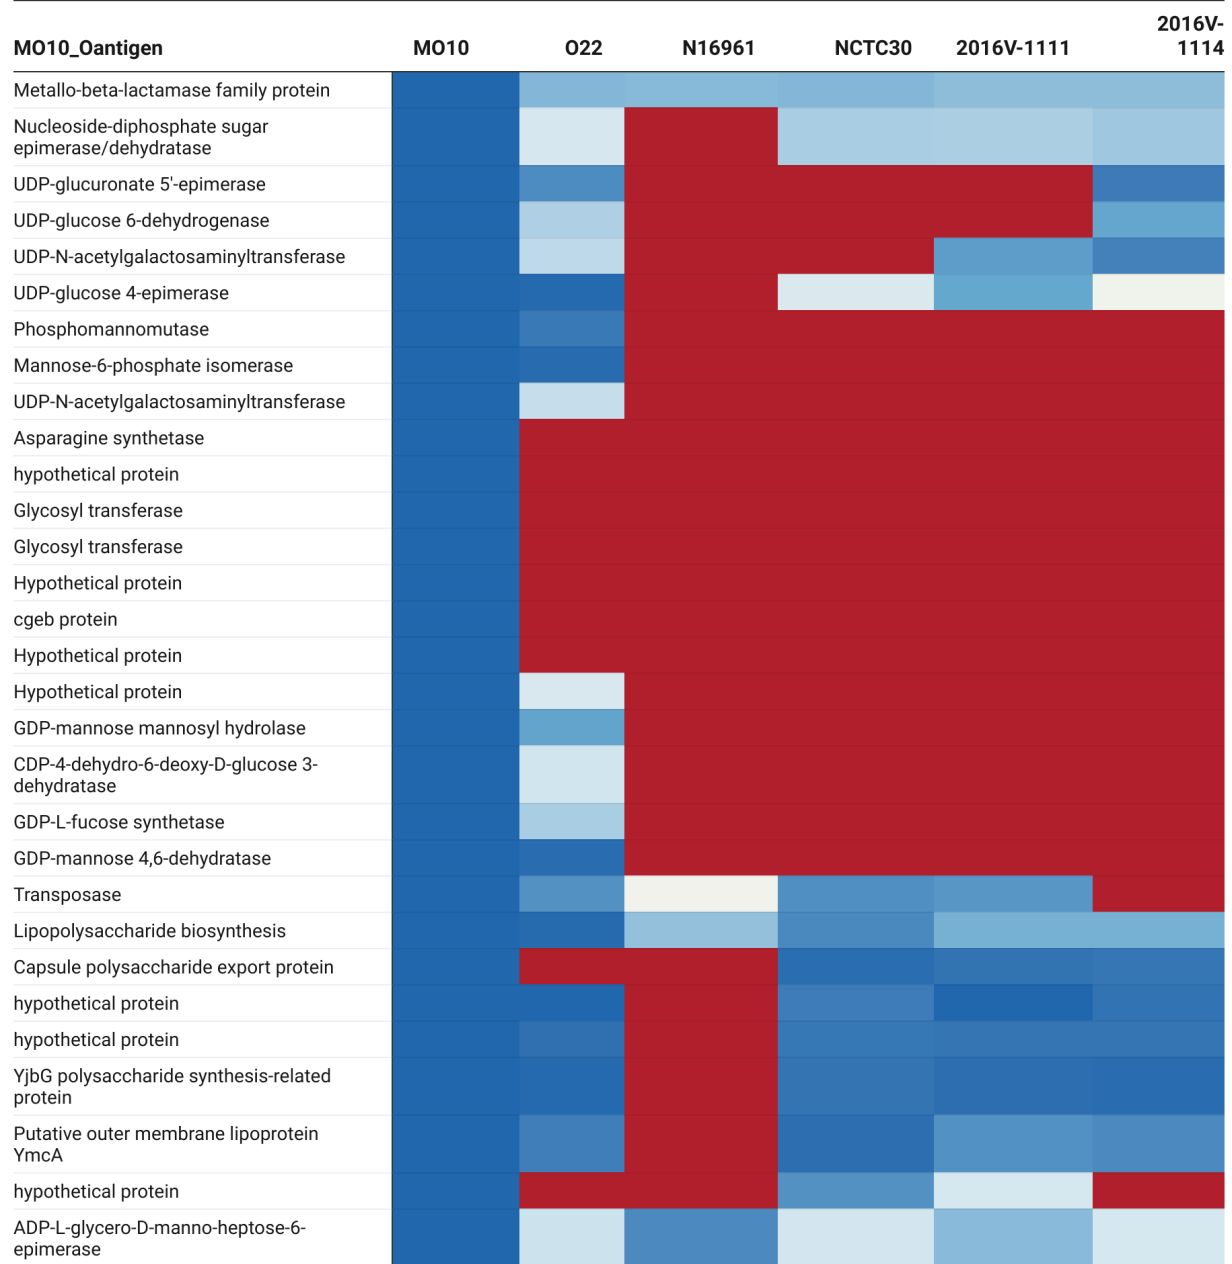

**Figure S6: Comparison of O-antigen biosynthesis region of *V. cholerae* O139 with *V. cholerae* O22, *V. cholerae* O1 and *V. paracholerae* sp. nov. MO10: reference strain for *V. cholerae* O139; O22: O-antigen region for *V. cholerae* serogroup O22; N16961: reference strain for *V. cholerae* O1, NCTC30: *V. paracholerae***

sp. nov., 2016V-1111: *V.paracholerae* sp. nov.; 2016V-1114: *V.paracholerae* sp. nov. O-antigen regions were extracted and compared using BLASTN.

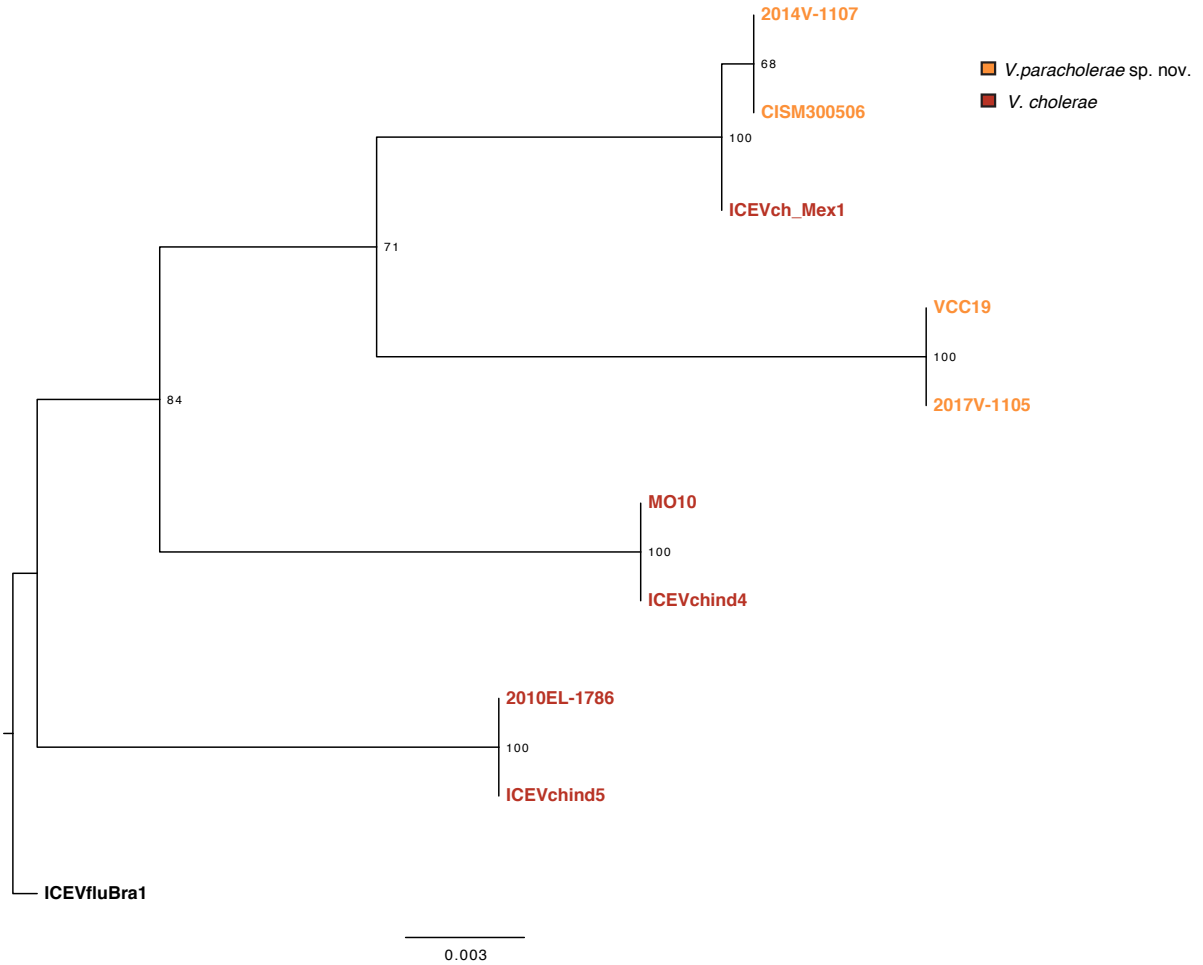

**Figure S7: Maximum likelihood tree of the 1243 bp integrase gene (int) found in integrative conjugative element (ICE) of *V. paracholerae* sp. nov. and *V. cholerae* strains.** Sequence of integrase gene found in *V. fluvialis* (ICEVfluBra1) was used as outgroup to root the tree. Bootstrap values are shown on the corresponding nodes.

**Table S1: Physiochemical data ranges of the two sampling locations used in the study.**

| Location    | Number of samples | Salinity range (ppt) | DO range (mg/L) | pH range | Temperature range (°C) |
|-------------|-------------------|----------------------|-----------------|----------|------------------------|
| Dhaka       | 60                | 0-0.8                | 0.19-5.05       | 6.4-7.7  | 27.1-33.6              |
| Oyster Pond | 40                | 0-6                  | 5.4-8.6         | 5.5-7.5  | 10.5-28                |



**Table S2: Responses towards chemical/heavy metals of *Vibrio paracholerae* sp. nov., differentiating it from its closest relatives *Vibrio cholerae*. R: resistant; S: sensitive; ND: not done.**

| Chemical/ heavy metal | <i>Vibrio paracholerae</i> sp. nov. |         |         |            | <i>Vibrio cholerae</i> |     |        |        |
|-----------------------|-------------------------------------|---------|---------|------------|------------------------|-----|--------|--------|
|                       | EDC 690                             | EDC 716 | EDC 792 | 2016V-1091 | N16961                 | V52 | YB3B05 | YB8E08 |
| Cadmium chloride      | R                                   | R       | R       | ND         | S                      | S   | ND     | ND     |
| Sodium selenite       | R                                   | R       | R       | ND         | S                      | S   | ND     | ND     |
| Dichlofuanid          | R                                   | R       | R       | ND         | S                      | S   | ND     | ND     |

**Table S3: Presence of potential virulence traits in *V. paracholerae* sp. nov isolates in comparison to *V. cholerae* reference strains**

| Strain      | Phylogenetic group                      | CTX-VPI1-VPI2 | RTX toxin | SXT element | T3SS | RND efflux gene cluster | Cholix toxin (chxA) | $\beta$ -lactamase |
|-------------|-----------------------------------------|---------------|-----------|-------------|------|-------------------------|---------------------|--------------------|
| N16961      | <i>V. cholerae</i> O1 El Tor (PG)       | +             | +         | -           | -    | -                       | -                   | -                  |
| O395        | <i>V. cholerae</i> O1 classical (PG)    | +             | +         | -           | -    | -                       | -                   | -                  |
| MO10        | <i>V. cholerae</i> O139 (PG)            | +             | +         | +           | -    | -                       | -                   | -                  |
| 12129       | <i>V. cholerae</i> non-O1/O139 (non-PG) | -             | +         | -           | +    | -                       | -                   | -                  |
| VCC19       | <i>V. paracholerae</i> sp. nov.         | -             | +         | +           | -    | +                       | -                   | +                  |
| 877163      |                                         | -             | +         | -           | +    | +                       | +                   | -                  |
| EDC-792     |                                         | -             | +         | -           | -    | +                       | +                   | -                  |
| EDC-690     |                                         | -             | +         | -           | -    | -                       | +                   | -                  |
| EDC-716     |                                         | -             | +         | -           | -    | +                       | -                   | -                  |
| EDC-717     |                                         | -             | +         | -           | -    | +                       | -                   | -                  |
| HE09        |                                         | -             | +         | -           | -    | +                       | +                   | -                  |
| HE16        |                                         | -             | +         | -           | -    | +                       | -                   | -                  |
| CISM300506  |                                         | -             | +         | +           | -    | +                       | +                   | +                  |
| CISM1163068 |                                         | -             | +         | +           | -    | +                       | +                   | +                  |
| 49093-DA89  |                                         | -             | +         | -           | -    | +                       | -                   | +                  |
| SIO         |                                         | -             | +         | -           | -    | -                       | +                   | -                  |
| 2017V-1144  |                                         | -             | +         | -           | -    | +                       | -                   | +                  |

|            |   |   |   |   |   |   |   |
|------------|---|---|---|---|---|---|---|
| 2014V-1107 | - | + | + | - | + | + | - |
| 2017V-1105 | - | + | + | - | + | + | + |
| 2016V-1114 | - | + | - | + | + | - | - |
| 2016V-1111 | - | + | - | + | + | - | - |
| 2017V-1176 | - | + | - | - | + | - | + |
| 2016V-1091 | - | + | - | - | + | + | - |
| 2017V-1110 | - | + | - | - | - | - | - |
| 87395      | - | + | - | - | + | + | + |
| 07-2425    | - | - | - | - | + | - | - |
| NCTC 30    | - | + | - | + | + | - | + |

**Table S4: Information of genomes falling into the *V. paracholerae* sp. nov clade disclosed in the NCBI database after 2019. dDDH: digital DNA-DNA hybridization value; Clin: clinical; Env: environmental.**

| <b>Strain</b> | <b>Origin</b> | <b>Source</b> | <b>dDDH with <i>V. paracholerae</i> sp. nov (EDC792)</b> | <b>NCBI genome accession number</b> |
|---------------|---------------|---------------|----------------------------------------------------------|-------------------------------------|
| N2784         | China         | Clin          | 85.2                                                     | VSHN01000030.1                      |
| N2770         | China         | Clin          | 85.7                                                     | VSHB01000078.1                      |
| N2768         | China         | Clin          | 89.4                                                     | VSGZ01000037.1                      |
| EL2338        | China         | Clin          | 89.1                                                     | VMPB01000147.1                      |
| 2204          | Brazil        | Env           | 85.8                                                     | VHOF01000002.1                      |
| 2290          | Brazil        | Env           | 79.1                                                     | VHOE01000001.1                      |
| N2748         | China         | Clin          | 83.7                                                     | VSGI01000001.1                      |
| EL2403        | China         | Clin          | 83.2                                                     | VMOL01000089.1                      |
| A110912Z3     | Austria       | Env           | 82.4                                                     | VIQC01000020.1                      |
| N2807         | China         | Clin          | 83                                                       | VSID01000044.1                      |
| N2795         | China         | Clin          | 83.2                                                     | VSHY01000044.1                      |
| N2794         | China         | Clin          | 83.4                                                     | VSHX01000029.1                      |
| N2791         | China         | Clin          | 83.3                                                     | VSHU01000058.1                      |
| A3_296        | Brazil        | Clin          | 80.6                                                     | QBJE01000015.1                      |
| FORC_076      | South korea   | Clin          | 86                                                       | NZ_CP026531                         |

**Table S5: Type VI secretion system effector and immunity gene combinations in *V. paracholerae* sp. nov strains.** Genes in three loci are identified and named using the scheme described in Kirchberger *et al* (Kirchberger PC, Unterweger D, Provenzano D, et al. 2017. Sequential displacement of Type VI Secretion System effector genes leads to evolution of diverse immunity gene arrays in *Vibrio cholerae*. Sci Rep. <https://doi.org/10.1038/srep45133>).

| Strain      | T6SS effector immunity locus |      |           |
|-------------|------------------------------|------|-----------|
|             | aux1                         | aux2 | main      |
| 07-2425     | Aacc                         | Dddd | LliE*ecga |
| 2014V-1107  | Cc                           | Dd   | Aa        |
| 2016V-1091  | Ccccc                        | Aa   | FfbE*ec   |
| 2016V-1111  | Cccc                         | Dd   | Hh        |
| 2016V-1114  | Cccc                         | Dd   | Hh        |
| 2017V-1105  | Cc                           | Dd   | Aa        |
| 2017V-1110  | Cc                           | Aa   | Gg        |
| 2017V-1144  | AAcc                         | Dd   | Ll        |
| 2017V-1176  | Cccc                         | Aa   | Aa        |
| NCTC30      | Aacc                         | Dd   | Ii        |
| CISM300506  | Cc                           | Dd   | Aa        |
| CISM1163068 | Aacc                         | Dddd | LliE*ecga |
| EDC 690     | Aaaaac                       | Dd   | Aa        |
| EDC 792     | Ccccc                        | Dd   | Hh        |
| EDC 717     | Cccc                         | Aa   | Ii        |
| EDC 716     | Cccc                         | Aa   | Ii        |
| 49093-DA89  | Aacc                         | Dddd | LliE*ecga |
| HE-09       | Aacc                         | Dddd | Aa        |
| 87395*      | Aacc                         | Dddd | LliE*ecga |
| HE-16       | Aacc                         | Dd   | Lli       |
| VCC19       | Cc                           | Dd   | Aa        |
| 877163      | Aac                          | Dd   | Ii        |

Upper case: Effector

Lower case: Immunity

\* Denotes truncated E-type effector
